# Supplementary material for: The Structure of 2,6-Di-tert-butylphenol–Argon by Rotational Spectroscopy
Source: MDPI journal article supplement (doi:10.3390/molecules28248111), 2023-12-15

# The Structure of 2,6-Di-*tert*-butylphenol–Argon by Rotational Spectroscopy

Wenqin Li <sup>1</sup>, Assimo Maris <sup>2</sup>, Sonia Melandri <sup>2</sup>, Alberto Lesarri <sup>1,\*</sup> and Luca Evangelisti <sup>3,\*</sup>

<sup>1</sup> Departamento de Química Física y Química Inorgánica, Facultad de Ciencias—I.U. CINQUIMA, Universidad de Valladolid, Paseo de Belén 7, 47011 Valladolid, Spain; wenqin.li@uva.es

<sup>2</sup> Department of Chemistry “G. Ciamician”, University of Bologna, Via F. Selmi 2, 40126 Bologna, Italy; assimo.maris@unibo.it (A.M.); sonia.melandri@unibo.it (S.M.)

<sup>3</sup> Department of Chemistry “G. Ciamician”, University of Bologna, Via S. Alberto 163, 48123 Ravenna, Italy

\* Correspondence: alberto.lesarri@uva.es (A.L.); luca.evangelisti6@unibo.it (L.E.)

**Table S1.** Measured rotational transitions of 2,6-di-*tert*-butylphenol – Ar complex, residuals according to fit of Table 1 in the main article (all values in MHz).

| $J'$ | $K_{-1}'$ | $K_{+1}'$ | $v'$ | $J''$ | $K_{-1}''$ | $K_{+1}''$ | $v''$ | Frequency (MHz) | Residual (MHz) |
|------|-----------|-----------|------|-------|------------|------------|-------|-----------------|----------------|
| 7    | 1         | 7         | 0    | 6     | 1          | 6          | 1     | 4061.574        | 0.002          |
| 7    | 0         | 7         | 0    | 6     | 0          | 6          | 1     | 4073.646        | 0.004          |
| 7    | 1         | 7         | 1    | 6     | 1          | 6          | 0     | 4419.394        | 0.006          |
| 7    | 0         | 7         | 1    | 6     | 0          | 6          | 0     | 4431.478        | 0.010          |
| 8    | 0         | 8         | 0    | 7     | 0          | 7          | 1     | 4660.426        | -0.004         |
| 8    | 1         | 8         | 0    | 7     | 1          | 7          | 1     | 4654.077        | 0.002          |
| 8    | 1         | 7         | 0    | 7     | 1          | 6          | 1     | 4930.574        | 0.002          |
| 9    | 1         | 9         | 0    | 8     | 1          | 8          | 1     | 5245.326        | 0.003          |
| 9    | 0         | 9         | 0    | 8     | 0          | 8          | 1     | 5248.515        | 0.001          |
| 6    | 1         | 5         | 1    | 5     | 1          | 4          | 0     | 4089.308        | -0.003         |
| 6    | 2         | 4         | 1    | 5     | 2          | 3          | 0     | 4158.475        | -0.004         |
| 7    | 2         | 6         | 0    | 6     | 2          | 5          | 1     | 4246.389        | 0.000          |
| 7    | 1         | 6         | 0    | 6     | 1          | 5          | 1     | 4338.861        | -0.006         |
| 7    | 2         | 6         | 1    | 6     | 2          | 5          | 0     | 4602.518        | 0.005          |
| 7    | 1         | 6         | 1    | 6     | 1          | 5          | 0     | 4695.070        | -0.005         |
| 6    | 3         | 3         | 1    | 5     | 3          | 2          | 0     | 4083.188        | -0.001         |
| 7    | 3         | 5         | 0    | 6     | 3          | 4          | 1     | 4330.681        | -0.005         |
| 7    | 5         | 3         | 0    | 6     | 5          | 2          | 1     | 4330.953        | 0.018          |
| 7    | 5         | 2         | 0    | 6     | 5          | 1          | 1     | 4331.184        | 0.009          |
| 7    | 4         | 4         | 0    | 6     | 4          | 3          | 1     | 4339.305        | -0.004         |
| 7    | 4         | 3         | 0    | 6     | 4          | 2          | 1     | 4346.221        | 0.000          |
| 7    | 2         | 5         | 0    | 6     | 2          | 4          | 1     | 4467.722        | -0.007         |
| 7    | 3         | 5         | 1    | 6     | 3          | 4          | 0     | 4688.096        | 0.000          |
| 7    | 5         | 3         | 1    | 6     | 5          | 2          | 0     | 4688.515        | -0.020         |
| 7    | 5         | 2         | 1    | 6     | 5          | 1          | 0     | 4688.765        | -0.011         |
| 7    | 4         | 4         | 1    | 6     | 4          | 3          | 0     | 4696.822        | 0.005          |
| 7    | 4         | 3         | 1    | 6     | 4          | 2          | 0     | 4703.735        | 0.000          |
| 7    | 3         | 4         | 1    | 6     | 3          | 3          | 0     | 4763.806        | 0.003          |
| 7    | 2         | 5         | 1    | 6     | 2          | 4          | 0     | 4825.226        | -0.013         |
| 8    | 2         | 7         | 0    | 7     | 2          | 6          | 1     | 4854.827        | 0.000          |
| 8    | 3         | 6         | 0    | 7     | 3          | 5          | 1     | 4968.823        | 0.004          |
| 8    | 5         | 4         | 0    | 7     | 5          | 3          | 1     | 4981.601        | -0.001         |
| 8    | 5         | 3         | 0    | 7     | 5          | 2          | 1     | 4982.538        | -0.007         |
| 8    | 4         | 5         | 0    | 7     | 4          | 4          | 1     | 4991.027        | -0.001         |
| 8    | 4         | 4         | 0    | 7     | 4          | 3          | 1     | 5009.082        | 0.000          |
| 8    | 1         | 8         | 1    | 7     | 1          | 7          | 0     | 5011.892        | 0.013          |
| 8    | 0         | 8         | 1    | 7     | 0          | 7          | 0     | 5018.253        | 0.010          |

|    |   |    |   |    |   |    |   |          |        |
|----|---|----|---|----|---|----|---|----------|--------|
| 8  | 3 | 5  | 0 | 7  | 3 | 4  | 1 | 5095.935 | 0.000  |
| 8  | 2 | 6  | 0 | 7  | 2 | 5  | 1 | 5120.182 | -0.004 |
| 8  | 1 | 7  | 1 | 7  | 1 | 6  | 0 | 5287.357 | -0.001 |
| 8  | 3 | 6  | 1 | 7  | 3 | 5  | 0 | 5326.050 | 0.006  |
| 8  | 6 | 3  | 1 | 7  | 6 | 2  | 0 | 5330.590 | 0.012  |
| 8  | 5 | 4  | 1 | 7  | 5 | 3  | 0 | 5339.048 | 0.005  |
| 8  | 5 | 3  | 1 | 7  | 5 | 2  | 0 | 5339.977 | -0.009 |
| 8  | 4 | 4  | 1 | 7  | 4 | 3  | 0 | 5366.450 | -0.002 |
| 8  | 3 | 5  | 1 | 7  | 3 | 4  | 0 | 5453.329 | -0.004 |
| 9  | 2 | 8  | 0 | 8  | 2 | 7  | 1 | 5459.209 | 0.000  |
| 8  | 2 | 6  | 1 | 7  | 2 | 5  | 0 | 5477.548 | -0.005 |
| 9  | 1 | 8  | 0 | 8  | 1 | 7  | 1 | 5510.615 | 0.000  |
| 9  | 3 | 7  | 0 | 8  | 3 | 6  | 1 | 5600.804 | -0.003 |
| 9  | 0 | 9  | 1 | 8  | 0 | 8  | 0 | 5606.320 | 0.007  |
| 9  | 5 | 5  | 0 | 8  | 5 | 4  | 1 | 5634.447 | -0.008 |
| 9  | 5 | 4  | 0 | 8  | 5 | 3  | 1 | 5637.428 | -0.004 |
| 9  | 4 | 6  | 0 | 8  | 4 | 5  | 1 | 5642.383 | 0.000  |
| 9  | 4 | 5  | 0 | 8  | 4 | 4  | 1 | 5682.340 | -0.004 |
| 9  | 2 | 7  | 0 | 8  | 2 | 6  | 1 | 5754.598 | 0.003  |
| 9  | 3 | 6  | 0 | 8  | 3 | 5  | 1 | 5785.787 | 0.005  |
| 9  | 2 | 8  | 1 | 8  | 2 | 7  | 0 | 5817.323 | 0.012  |
| 10 | 0 | 10 | 0 | 9  | 0 | 9  | 1 | 5837.404 | -0.007 |
| 9  | 1 | 8  | 1 | 8  | 1 | 7  | 0 | 5868.786 | 0.005  |
| 9  | 6 | 4  | 1 | 8  | 6 | 3  | 0 | 5980.186 | -0.018 |
| 9  | 6 | 3  | 1 | 8  | 6 | 2  | 0 | 5980.325 | 0.012  |
| 9  | 5 | 5  | 1 | 8  | 5 | 4  | 0 | 5991.717 | -0.001 |
| 9  | 5 | 4  | 1 | 8  | 5 | 3  | 0 | 5994.706 | 0.006  |
| 9  | 4 | 6  | 1 | 8  | 4 | 5  | 0 | 5999.552 | 0.000  |
| 9  | 4 | 5  | 1 | 8  | 4 | 4  | 0 | 6039.568 | -0.003 |
| 10 | 2 | 9  | 0 | 9  | 2 | 8  | 1 | 6058.521 | 0.000  |
| 10 | 1 | 9  | 0 | 9  | 1 | 8  | 1 | 6090.809 | 0.000  |
| 9  | 2 | 7  | 1 | 8  | 2 | 6  | 0 | 6111.745 | -0.008 |
| 9  | 3 | 6  | 1 | 8  | 3 | 5  | 0 | 6143.067 | -0.006 |
| 10 | 1 | 10 | 1 | 9  | 1 | 9  | 0 | 6193.650 | -0.001 |
| 10 | 0 | 10 | 1 | 9  | 0 | 9  | 0 | 6195.206 | 0.005  |
| 10 | 3 | 8  | 0 | 9  | 3 | 7  | 1 | 6225.751 | 0.007  |
| 10 | 5 | 6  | 0 | 9  | 5 | 5  | 1 | 6289.240 | 0.002  |
| 10 | 4 | 7  | 0 | 9  | 4 | 6  | 1 | 6291.551 | 0.000  |
| 10 | 5 | 5  | 0 | 9  | 5 | 4  | 1 | 6297.215 | -0.003 |
| 10 | 4 | 6  | 0 | 9  | 4 | 5  | 1 | 6368.124 | 0.000  |
| 10 | 2 | 8  | 0 | 9  | 2 | 7  | 1 | 6368.352 | -0.052 |
| 11 | 1 | 11 | 0 | 10 | 1 | 10 | 1 | 6426.029 | -0.003 |
| 11 | 0 | 11 | 0 | 10 | 0 | 10 | 1 | 6426.755 | -0.009 |
| 10 | 1 | 9  | 1 | 9  | 1 | 8  | 0 | 6448.651 | 0.000  |
| 10 | 3 | 7  | 0 | 9  | 3 | 6  | 1 | 6466.547 | 0.009  |
| 10 | 3 | 8  | 1 | 9  | 3 | 7  | 0 | 6582.379 | 0.008  |
| 10 | 5 | 6  | 1 | 9  | 5 | 5  | 0 | 6646.305 | 0.000  |
| 10 | 4 | 7  | 1 | 9  | 4 | 6  | 0 | 6648.518 | 0.000  |
| 10 | 4 | 6  | 1 | 9  | 4 | 5  | 0 | 6725.216 | 0.003  |
| 11 | 1 | 11 | 1 | 10 | 1 | 10 | 0 | 6783.797 | -0.012 |
| 11 | 0 | 11 | 1 | 10 | 0 | 10 | 0 | 6784.527 | -0.014 |
| 4  | 1 | 4  | 0 | 3  | 1 | 3  | 1 | 2267.896 | 0.027  |
| 4  | 0 | 4  | 0 | 3  | 0 | 3  | 1 | 2313.620 | 0.050  |
| 4  | 2 | 3  | 0 | 3  | 2 | 2  | 1 | 2376.249 | 0.011  |
| 4  | 2 | 2  | 0 | 3  | 2 | 1  | 1 | 2444.746 | -0.002 |
| 4  | 1 | 3  | 0 | 3  | 1 | 2  | 1 | 2465.131 | -0.002 |

|    |   |    |   |    |   |    |   |          |        |
|----|---|----|---|----|---|----|---|----------|--------|
| 4  | 1 | 4  | 1 | 3  | 1 | 3  | 0 | 2625.803 | 0.005  |
| 4  | 0 | 4  | 1 | 3  | 0 | 3  | 0 | 2671.519 | -0.002 |
| 4  | 2 | 3  | 1 | 3  | 2 | 2  | 0 | 2733.950 | 0.005  |
| 4  | 3 | 2  | 1 | 3  | 3 | 1  | 0 | 2753.572 | 0.014  |
| 4  | 3 | 1  | 1 | 3  | 3 | 0  | 0 | 2758.048 | 0.014  |
| 4  | 2 | 2  | 1 | 3  | 2 | 1  | 0 | 2802.497 | -0.012 |
| 4  | 1 | 3  | 1 | 3  | 1 | 2  | 0 | 2822.854 | -0.014 |
| 5  | 1 | 5  | 0 | 4  | 1 | 4  | 1 | 2869.447 | 0.011  |
| 5  | 0 | 5  | 0 | 4  | 0 | 4  | 1 | 2903.229 | -0.005 |
| 5  | 2 | 4  | 0 | 4  | 2 | 3  | 1 | 3005.459 | 0.000  |
| 5  | 3 | 3  | 0 | 4  | 3 | 2  | 1 | 3042.280 | -0.008 |
| 5  | 3 | 2  | 0 | 4  | 3 | 1  | 1 | 3057.411 | 0.005  |
| 5  | 1 | 4  | 0 | 4  | 1 | 3  | 1 | 3106.477 | -0.006 |
| 5  | 2 | 3  | 0 | 4  | 2 | 2  | 1 | 3124.149 | -0.012 |
| 5  | 1 | 5  | 1 | 4  | 1 | 4  | 0 | 3227.309 | 0.008  |
| 5  | 0 | 5  | 1 | 4  | 0 | 4  | 0 | 3261.120 | -0.001 |
| 5  | 2 | 4  | 1 | 4  | 2 | 3  | 0 | 3363.033 | 0.005  |
| 5  | 3 | 3  | 1 | 4  | 3 | 2  | 0 | 3399.979 | 0.003  |
| 5  | 3 | 2  | 1 | 4  | 3 | 1  | 0 | 3415.105 | 0.000  |
| 5  | 1 | 4  | 1 | 4  | 1 | 3  | 0 | 3464.097 | -0.008 |
| 6  | 1 | 6  | 0 | 5  | 1 | 5  | 1 | 3467.022 | 0.002  |
| 5  | 2 | 3  | 1 | 4  | 2 | 2  | 0 | 3481.857 | 0.001  |
| 6  | 0 | 6  | 0 | 5  | 0 | 5  | 1 | 3488.356 | 0.006  |
| 6  | 4 | 3  | 0 | 5  | 4 | 2  | 1 | 3688.613 | -0.001 |
| 6  | 4 | 2  | 0 | 5  | 4 | 1  | 1 | 3690.742 | -0.012 |
| 6  | 3 | 3  | 0 | 5  | 3 | 2  | 1 | 3725.583 | -0.006 |
| 6  | 1 | 5  | 0 | 5  | 1 | 4  | 1 | 3731.903 | -0.003 |
| 6  | 2 | 4  | 0 | 5  | 2 | 3  | 1 | 3800.862 | -0.004 |
| 6  | 1 | 6  | 1 | 5  | 1 | 5  | 0 | 3824.860 | 0.007  |
| 6  | 0 | 6  | 1 | 5  | 0 | 5  | 0 | 3846.205 | 0.005  |
| 6  | 2 | 5  | 1 | 5  | 2 | 4  | 0 | 3986.082 | 0.006  |
| 6  | 3 | 4  | 1 | 5  | 3 | 3  | 0 | 4045.458 | 0.002  |
| 6  | 4 | 3  | 1 | 5  | 4 | 2  | 0 | 4046.263 | 0.002  |
| 6  | 4 | 2  | 1 | 5  | 4 | 1  | 0 | 4048.396 | -0.007 |
| 10 | 3 | 7  | 1 | 9  | 3 | 6  | 0 | 6823.694 | -0.005 |
| 11 | 3 | 9  | 0 | 10 | 3 | 8  | 1 | 6843.721 | 0.001  |
| 11 | 4 | 8  | 0 | 10 | 4 | 7  | 1 | 6936.597 | 0.011  |
| 11 | 2 | 9  | 0 | 10 | 2 | 8  | 1 | 6962.559 | 0.004  |
| 11 | 2 | 10 | 1 | 10 | 2 | 9  | 0 | 7011.831 | 0.003  |
| 12 | 1 | 12 | 0 | 11 | 1 | 11 | 1 | 7016.006 | -0.008 |
| 11 | 1 | 10 | 1 | 10 | 1 | 9  | 0 | 7030.550 | 0.000  |
| 11 | 4 | 7  | 0 | 10 | 4 | 6  | 1 | 7064.843 | 0.019  |
| 11 | 3 | 8  | 0 | 10 | 3 | 7  | 1 | 7131.683 | -0.001 |
| 11 | 3 | 9  | 1 | 10 | 3 | 8  | 0 | 7199.417 | 0.004  |
| 12 | 2 | 11 | 0 | 11 | 2 | 10 | 1 | 7247.210 | -0.001 |
| 11 | 4 | 8  | 1 | 10 | 4 | 7  | 0 | 7293.326 | 0.010  |
| 11 | 5 | 7  | 1 | 10 | 5 | 6  | 0 | 7302.116 | 0.008  |
| 11 | 2 | 9  | 1 | 10 | 2 | 8  | 0 | 7318.424 | -0.001 |
| 11 | 5 | 6  | 1 | 10 | 5 | 5  | 0 | 7320.911 | 0.011  |
| 12 | 0 | 12 | 1 | 11 | 0 | 11 | 0 | 7374.095 | -0.024 |
| 11 | 4 | 7  | 1 | 10 | 4 | 6  | 0 | 7421.789 | 0.008  |
| 11 | 3 | 8  | 1 | 10 | 3 | 7  | 0 | 7488.677 | -0.001 |
| 12 | 2 | 10 | 0 | 11 | 2 | 9  | 1 | 7543.448 | 0.019  |
| 12 | 2 | 11 | 1 | 11 | 2 | 10 | 0 | 7604.872 | 0.000  |
| 12 | 1 | 11 | 1 | 11 | 1 | 10 | 0 | 7615.115 | 0.003  |
| 12 | 3 | 10 | 1 | 11 | 3 | 9  | 0 | 7808.832 | -0.005 |

|    |   |    |   |    |   |   |   |          |        |
|----|---|----|---|----|---|---|---|----------|--------|
| 12 | 2 | 10 | 1 | 11 | 2 | 9 | 0 | 7901.118 | -0.014 |
| 6  | 2 | 5  | 2 | 5  | 2 | 4 | 3 | 3628.925 | 0.002  |
| 6  | 4 | 3  | 2 | 5  | 4 | 2 | 3 | 3688.785 | -0.004 |
| 6  | 4 | 2  | 2 | 5  | 4 | 1 | 3 | 3690.920 | -0.009 |
| 6  | 3 | 3  | 2 | 5  | 3 | 2 | 3 | 3725.761 | -0.003 |
| 6  | 1 | 5  | 2 | 5  | 1 | 4 | 3 | 3732.086 | 0.002  |
| 6  | 2 | 4  | 2 | 5  | 2 | 3 | 3 | 3801.041 | -0.001 |
| 6  | 1 | 6  | 3 | 5  | 1 | 5 | 2 | 3824.685 | 0.007  |
| 6  | 0 | 6  | 3 | 5  | 0 | 5 | 2 | 3846.032 | 0.008  |
| 6  | 2 | 5  | 3 | 5  | 2 | 4 | 2 | 3985.900 | 0.000  |
| 6  | 3 | 4  | 3 | 5  | 3 | 3 | 2 | 4045.281 | 0.002  |
| 6  | 4 | 3  | 3 | 5  | 4 | 2 | 2 | 4046.087 | 0.004  |
| 6  | 4 | 2  | 3 | 5  | 4 | 1 | 2 | 4048.224 | -0.001 |
| 7  | 1 | 7  | 2 | 6  | 1 | 6 | 3 | 4061.750 | 0.004  |
| 7  | 0 | 7  | 2 | 6  | 0 | 6 | 3 | 4073.818 | 0.002  |
| 6  | 3 | 3  | 3 | 5  | 3 | 2 | 2 | 4083.008 | -0.004 |
| 6  | 1 | 5  | 3 | 5  | 1 | 4 | 2 | 4089.131 | -0.002 |
| 6  | 2 | 4  | 3 | 5  | 2 | 3 | 2 | 4158.295 | -0.006 |
| 7  | 2 | 6  | 2 | 6  | 2 | 5 | 3 | 4246.557 | 0.000  |
| 7  | 3 | 5  | 2 | 6  | 3 | 4 | 3 | 4330.852 | -0.009 |
| 7  | 1 | 6  | 2 | 6  | 1 | 5 | 3 | 4339.047 | 0.003  |
| 7  | 4 | 4  | 2 | 6  | 4 | 3 | 3 | 4339.485 | 0.000  |
| 7  | 4 | 3  | 2 | 6  | 4 | 2 | 3 | 4346.392 | -0.004 |
| 7  | 1 | 7  | 3 | 6  | 1 | 6 | 2 | 4419.219 | 0.006  |
| 7  | 0 | 7  | 3 | 6  | 0 | 6 | 2 | 4431.298 | 0.004  |
| 7  | 2 | 5  | 2 | 6  | 2 | 4 | 3 | 4467.904 | -0.002 |
| 7  | 2 | 6  | 3 | 6  | 2 | 5 | 2 | 4602.337 | 0.000  |
| 8  | 1 | 8  | 2 | 7  | 1 | 7 | 3 | 4654.249 | 0.001  |
| 8  | 0 | 8  | 2 | 7  | 0 | 7 | 3 | 4660.606 | 0.001  |
| 7  | 3 | 5  | 3 | 6  | 3 | 4 | 2 | 4687.920 | 0.001  |
| 7  | 5 | 3  | 3 | 6  | 5 | 2 | 2 | 4688.357 | -0.001 |
| 7  | 1 | 6  | 3 | 6  | 1 | 5 | 2 | 4694.905 | 0.000  |
| 7  | 4 | 4  | 3 | 6  | 4 | 3 | 2 | 4696.643 | 0.004  |
| 7  | 4 | 3  | 3 | 6  | 4 | 2 | 2 | 4703.561 | 0.002  |
| 7  | 3 | 4  | 3 | 6  | 3 | 3 | 2 | 4763.623 | 0.000  |
| 7  | 2 | 5  | 3 | 6  | 2 | 4 | 2 | 4825.053 | -0.006 |
| 8  | 2 | 7  | 2 | 7  | 2 | 6 | 3 | 4855.005 | 0.004  |
| 8  | 1 | 7  | 2 | 7  | 1 | 6 | 3 | 4930.740 | 0.000  |
| 8  | 3 | 6  | 2 | 7  | 3 | 5 | 3 | 4968.995 | 0.000  |
| 8  | 5 | 4  | 2 | 7  | 5 | 3 | 3 | 4981.772 | -0.005 |
| 8  | 5 | 3  | 2 | 7  | 5 | 2 | 3 | 4982.716 | -0.005 |
| 8  | 4 | 5  | 2 | 7  | 4 | 4 | 3 | 4991.202 | -0.003 |
| 8  | 4 | 4  | 2 | 7  | 4 | 3 | 3 | 5009.252 | -0.005 |
| 8  | 1 | 8  | 3 | 7  | 1 | 7 | 2 | 5011.712 | 0.007  |
| 8  | 0 | 8  | 3 | 7  | 0 | 7 | 2 | 5018.076 | 0.007  |
| 8  | 3 | 5  | 2 | 7  | 3 | 4 | 3 | 5096.114 | 0.002  |
| 8  | 2 | 6  | 2 | 7  | 2 | 5 | 3 | 5120.360 | -0.004 |
| 9  | 1 | 9  | 2 | 8  | 1 | 8 | 3 | 5245.496 | 0.000  |
| 9  | 0 | 9  | 2 | 8  | 0 | 8 | 3 | 5248.684 | -0.001 |
| 8  | 1 | 7  | 3 | 7  | 1 | 6 | 2 | 5287.185 | 0.001  |
| 8  | 3 | 6  | 3 | 7  | 3 | 5 | 2 | 5325.872 | 0.007  |
| 8  | 6 | 3  | 3 | 7  | 6 | 2 | 2 | 5330.419 | 0.018  |
| 8  | 6 | 2  | 3 | 7  | 6 | 1 | 2 | 5330.419 | -0.004 |
| 8  | 5 | 4  | 3 | 7  | 5 | 3 | 2 | 5338.866 | 0.001  |
| 8  | 5 | 3  | 3 | 7  | 5 | 2 | 2 | 5339.807 | -0.002 |
| 8  | 4 | 4  | 3 | 7  | 4 | 3 | 2 | 5366.275 | 0.000  |

|    |   |    |   |    |   |    |   |          |        |
|----|---|----|---|----|---|----|---|----------|--------|
| 8  | 3 | 5  | 3 | 7  | 3 | 4  | 2 | 5453.152 | -0.002 |
| 9  | 2 | 8  | 2 | 8  | 2 | 7  | 3 | 5459.389 | 0.004  |
| 8  | 2 | 6  | 3 | 7  | 2 | 5  | 2 | 5477.368 | -0.005 |
| 9  | 1 | 8  | 2 | 8  | 1 | 7  | 3 | 5510.792 | 0.003  |
| 9  | 3 | 7  | 2 | 8  | 3 | 6  | 3 | 5600.989 | 0.005  |
| 9  | 1 | 9  | 3 | 8  | 1 | 8  | 2 | 5602.950 | 0.004  |
| 9  | 0 | 9  | 3 | 8  | 0 | 8  | 2 | 5606.141 | 0.001  |
| 9  | 5 | 5  | 2 | 8  | 5 | 4  | 3 | 5634.627 | -0.005 |
| 9  | 5 | 4  | 2 | 8  | 5 | 3  | 3 | 5637.600 | -0.008 |
| 9  | 4 | 6  | 2 | 8  | 4 | 5  | 3 | 5642.558 | 0.000  |
| 9  | 4 | 5  | 2 | 8  | 4 | 4  | 3 | 5682.521 | 0.000  |
| 9  | 2 | 7  | 2 | 8  | 2 | 6  | 3 | 5754.773 | 0.000  |
| 9  | 3 | 6  | 2 | 8  | 3 | 5  | 3 | 5785.960 | 0.001  |
| 9  | 2 | 8  | 3 | 8  | 2 | 7  | 2 | 5817.140 | 0.002  |
| 10 | 0 | 10 | 2 | 9  | 0 | 9  | 3 | 5837.579 | -0.004 |
| 9  | 1 | 8  | 3 | 8  | 1 | 7  | 2 | 5868.604 | -0.001 |
| 9  | 6 | 4  | 3 | 8  | 6 | 3  | 2 | 5980.025 | -0.001 |
| 9  | 6 | 3  | 3 | 8  | 6 | 2  | 2 | 5980.139 | 0.004  |
| 9  | 5 | 5  | 3 | 8  | 5 | 4  | 2 | 5991.538 | -0.001 |
| 9  | 5 | 4  | 3 | 8  | 5 | 3  | 2 | 5994.519 | -0.001 |
| 9  | 4 | 6  | 3 | 8  | 4 | 5  | 2 | 5999.373 | 0.000  |
| 9  | 4 | 5  | 3 | 8  | 4 | 4  | 2 | 6039.395 | 0.003  |
| 10 | 2 | 9  | 2 | 9  | 2 | 8  | 3 | 6058.700 | 0.003  |
| 10 | 1 | 9  | 2 | 9  | 1 | 8  | 3 | 6090.984 | 0.000  |
| 9  | 2 | 7  | 3 | 8  | 2 | 6  | 2 | 6111.567 | -0.006 |
| 9  | 3 | 6  | 3 | 8  | 3 | 5  | 2 | 6142.892 | 0.000  |
| 10 | 1 | 10 | 3 | 9  | 1 | 9  | 2 | 6193.481 | 0.002  |
| 10 | 0 | 10 | 3 | 9  | 0 | 9  | 2 | 6195.024 | -0.003 |
| 10 | 3 | 8  | 2 | 9  | 3 | 7  | 3 | 6225.921 | 0.000  |
| 10 | 5 | 6  | 2 | 9  | 5 | 5  | 3 | 6289.409 | -0.004 |
| 10 | 4 | 7  | 2 | 9  | 4 | 6  | 3 | 6291.729 | 0.000  |
| 10 | 5 | 5  | 2 | 9  | 5 | 4  | 3 | 6297.395 | 0.000  |
| 10 | 2 | 8  | 2 | 9  | 2 | 7  | 3 | 6368.587 | 0.003  |
| 11 | 1 | 11 | 2 | 10 | 1 | 10 | 3 | 6426.199 | -0.004 |
| 11 | 0 | 11 | 2 | 10 | 0 | 10 | 3 | 6426.919 | -0.016 |
| 10 | 1 | 9  | 3 | 9  | 1 | 8  | 2 | 6448.474 | 0.000  |
| 10 | 3 | 7  | 2 | 9  | 3 | 6  | 3 | 6466.723 | 0.006  |
| 10 | 3 | 8  | 3 | 9  | 3 | 7  | 2 | 6582.197 | 0.005  |
| 10 | 5 | 6  | 3 | 9  | 5 | 5  | 2 | 6646.129 | 0.003  |
| 10 | 4 | 7  | 3 | 9  | 4 | 6  | 2 | 6648.340 | 0.003  |
| 11 | 2 | 10 | 2 | 10 | 2 | 9  | 3 | 6654.290 | -0.008 |
| 10 | 5 | 5  | 3 | 9  | 5 | 4  | 2 | 6654.081 | -0.038 |
| 11 | 1 | 10 | 2 | 10 | 1 | 9  | 3 | 6672.993 | 0.000  |
| 10 | 4 | 6  | 3 | 9  | 4 | 5  | 2 | 6725.037 | 0.005  |
| 10 | 2 | 8  | 3 | 9  | 2 | 7  | 2 | 6725.037 | -0.002 |
| 11 | 1 | 11 | 3 | 10 | 1 | 10 | 2 | 6783.635 | -0.003 |
| 11 | 0 | 11 | 3 | 10 | 0 | 10 | 2 | 6784.358 | -0.012 |
| 10 | 3 | 7  | 3 | 9  | 3 | 6  | 2 | 6823.518 | 0.000  |
| 11 | 3 | 9  | 2 | 10 | 3 | 8  | 3 | 6843.902 | 0.006  |
| 11 | 4 | 8  | 2 | 10 | 4 | 7  | 3 | 6936.769 | 0.006  |
| 11 | 2 | 9  | 2 | 10 | 2 | 8  | 3 | 6962.737 | 0.004  |
| 11 | 2 | 10 | 3 | 10 | 2 | 9  | 2 | 7011.656 | 0.003  |
| 11 | 1 | 10 | 3 | 10 | 1 | 9  | 2 | 7030.377 | 0.001  |
| 11 | 4 | 7  | 2 | 10 | 4 | 6  | 3 | 7065.012 | 0.010  |
| 11 | 3 | 8  | 2 | 10 | 3 | 7  | 3 | 7131.871 | 0.006  |
| 11 | 3 | 9  | 3 | 10 | 3 | 8  | 2 | 7199.242 | 0.008  |

|    |   |    |   |    |   |    |   |          |        |
|----|---|----|---|----|---|----|---|----------|--------|
| 12 | 2 | 11 | 2 | 11 | 2 | 10 | 3 | 7247.385 | 0.001  |
| 12 | 1 | 11 | 2 | 11 | 1 | 10 | 3 | 7257.599 | -0.005 |
| 11 | 4 | 8  | 3 | 10 | 4 | 7  | 2 | 7293.144 | 0.009  |
| 11 | 5 | 7  | 3 | 10 | 5 | 6  | 2 | 7301.937 | 0.010  |
| 11 | 2 | 9  | 3 | 10 | 2 | 8  | 2 | 7318.247 | 0.000  |
| 11 | 5 | 6  | 3 | 10 | 5 | 5  | 2 | 7320.725 | 0.006  |
| 12 | 1 | 12 | 3 | 11 | 1 | 11 | 2 | 7373.593 | -0.015 |
| 12 | 0 | 12 | 3 | 11 | 0 | 11 | 2 | 7373.934 | -0.014 |
| 11 | 4 | 7  | 3 | 10 | 4 | 6  | 2 | 7421.610 | 0.011  |
| 11 | 3 | 8  | 3 | 10 | 3 | 7  | 2 | 7488.497 | 0.002  |
| 12 | 2 | 10 | 2 | 11 | 2 | 9  | 3 | 7543.611 | 0.005  |
| 12 | 2 | 11 | 3 | 11 | 2 | 10 | 2 | 7604.706 | 0.007  |
| 12 | 1 | 11 | 3 | 11 | 1 | 10 | 2 | 7614.935 | -0.001 |
| 12 | 3 | 10 | 3 | 11 | 3 | 9  | 2 | 7808.664 | 0.004  |
| 6  | 0 | 6  | 2 | 5  | 0 | 5  | 3 | 3488.527 | 0.004  |
| 5  | 2 | 3  | 3 | 4  | 2 | 2  | 2 | 3481.679 | 0.000  |
| 6  | 1 | 6  | 2 | 5  | 1 | 5  | 3 | 3467.204 | 0.010  |
| 5  | 1 | 4  | 3 | 4  | 1 | 3  | 2 | 3463.923 | -0.005 |
| 5  | 3 | 2  | 3 | 4  | 3 | 1  | 2 | 3414.926 | -0.003 |
| 5  | 3 | 3  | 3 | 4  | 3 | 2  | 2 | 3399.801 | 0.002  |
| 5  | 4 | 1  | 3 | 4  | 4 | 0  | 2 | 3397.825 | -0.003 |
| 5  | 2 | 4  | 3 | 4  | 2 | 3  | 2 | 3362.857 | 0.005  |
| 5  | 0 | 5  | 3 | 4  | 0 | 4  | 2 | 3260.949 | 0.002  |
| 5  | 1 | 5  | 3 | 4  | 1 | 4  | 2 | 3227.134 | 0.007  |
| 5  | 2 | 3  | 2 | 4  | 2 | 2  | 3 | 3124.337 | 0.000  |
| 5  | 1 | 4  | 2 | 4  | 1 | 3  | 3 | 3106.658 | -0.001 |
| 5  | 3 | 2  | 2 | 4  | 3 | 1  | 3 | 3057.578 | -0.003 |
| 5  | 3 | 3  | 2 | 4  | 3 | 2  | 3 | 3042.466 | 0.002  |
| 5  | 2 | 4  | 2 | 4  | 2 | 3  | 3 | 3005.634 | 0.000  |
| 5  | 0 | 5  | 2 | 4  | 0 | 4  | 3 | 2903.415 | 0.006  |
| 5  | 1 | 5  | 2 | 4  | 1 | 4  | 3 | 2869.617 | 0.005  |
| 4  | 1 | 3  | 3 | 3  | 1 | 2  | 2 | 2822.682 | -0.009 |
| 4  | 2 | 2  | 3 | 3  | 2 | 1  | 2 | 2802.320 | -0.012 |
| 4  | 3 | 1  | 3 | 3  | 3 | 0  | 2 | 2757.840 | -0.017 |
| 4  | 3 | 2  | 3 | 3  | 3 | 1  | 2 | 2753.353 | -0.027 |
| 4  | 2 | 3  | 3 | 3  | 2 | 2  | 2 | 2733.780 | 0.012  |
| 4  | 0 | 4  | 3 | 3  | 0 | 3  | 2 | 2671.342 | -0.004 |
| 4  | 1 | 4  | 3 | 3  | 1 | 3  | 2 | 2625.622 | 0.000  |
| 4  | 1 | 3  | 2 | 3  | 1 | 2  | 3 | 2465.308 | -0.001 |
| 4  | 2 | 2  | 2 | 3  | 2 | 1  | 3 | 2444.918 | -0.006 |
| 4  | 2 | 3  | 2 | 3  | 2 | 2  | 3 | 2376.405 | -0.006 |
| 4  | 1 | 4  | 2 | 3  | 1 | 3  | 3 | 2268.043 | 0.000  |
| 6  | 2 | 5  | 5 | 5  | 2 | 4  | 4 | 3986.616 | 0.007  |
| 7  | 1 | 7  | 4 | 6  | 1 | 6  | 5 | 4061.048 | 0.010  |
| 7  | 0 | 7  | 4 | 6  | 0 | 6  | 5 | 4073.111 | 0.003  |
| 6  | 1 | 5  | 5 | 5  | 1 | 4  | 4 | 4089.836 | -0.004 |
| 6  | 2 | 4  | 5 | 5  | 2 | 3  | 4 | 4159.004 | -0.003 |
| 7  | 2 | 6  | 4 | 6  | 2 | 5  | 5 | 4245.876 | -0.002 |
| 7  | 4 | 3  | 4 | 6  | 4 | 2  | 5 | 4345.686 | -0.004 |
| 7  | 1 | 7  | 5 | 6  | 1 | 6  | 4 | 4419.942 | 0.020  |
| 7  | 0 | 7  | 5 | 6  | 0 | 6  | 4 | 4432.008 | 0.005  |
| 7  | 2 | 6  | 5 | 6  | 2 | 5  | 4 | 4603.051 | 0.005  |
| 8  | 0 | 8  | 4 | 7  | 0 | 7  | 5 | 4659.894 | -0.001 |
| 7  | 4 | 3  | 5 | 6  | 4 | 2  | 4 | 4704.271 | 0.004  |
| 7  | 3 | 4  | 5 | 6  | 3 | 3  | 4 | 4764.331 | 0.000  |
| 7  | 2 | 5  | 5 | 6  | 2 | 4  | 4 | 4825.760 | -0.006 |

|    |   |    |   |   |   |   |   |          |        |
|----|---|----|---|---|---|---|---|----------|--------|
| 8  | 2 | 7  | 4 | 7 | 2 | 6 | 5 | 4854.307 | 0.005  |
| 8  | 1 | 7  | 4 | 7 | 1 | 6 | 5 | 4930.061 | 0.000  |
| 8  | 4 | 5  | 4 | 7 | 4 | 4 | 5 | 4990.494 | -0.004 |
| 8  | 4 | 4  | 4 | 7 | 4 | 3 | 5 | 5008.553 | 0.001  |
| 6  | 3 | 4  | 5 | 5 | 3 | 3 | 4 | 4045.967 | -0.018 |
| 6  | 4 | 3  | 5 | 5 | 4 | 2 | 4 | 4046.790 | 0.000  |
| 6  | 3 | 3  | 5 | 5 | 3 | 2 | 4 | 4083.725 | 0.005  |
| 7  | 3 | 5  | 4 | 6 | 3 | 4 | 5 | 4330.138 | -0.016 |
| 7  | 1 | 6  | 4 | 6 | 1 | 5 | 5 | 4338.343 | 0.006  |
| 7  | 3 | 4  | 4 | 6 | 3 | 3 | 5 | 4405.775 | 0.001  |
| 8  | 1 | 8  | 4 | 7 | 1 | 7 | 5 | 4653.546 | 0.007  |
| 7  | 5 | 3  | 5 | 6 | 5 | 2 | 4 | 4689.060 | -0.005 |
| 7  | 5 | 2  | 5 | 6 | 5 | 1 | 4 | 4689.302 | -0.005 |
| 7  | 1 | 6  | 5 | 6 | 1 | 5 | 4 | 4695.576 | -0.008 |
| 7  | 4 | 4  | 5 | 6 | 4 | 3 | 4 | 4697.356 | 0.008  |
| 8  | 3 | 6  | 4 | 7 | 3 | 5 | 5 | 4968.291 | 0.003  |
| 8  | 5 | 4  | 4 | 7 | 5 | 3 | 5 | 4981.064 | -0.007 |
| 8  | 5 | 3  | 4 | 7 | 5 | 2 | 5 | 4981.998 | -0.016 |
| 8  | 1 | 8  | 5 | 7 | 1 | 7 | 4 | 5012.415 | 0.000  |
| 8  | 0 | 8  | 5 | 7 | 0 | 7 | 4 | 5018.783 | 0.004  |
| 8  | 3 | 5  | 4 | 7 | 3 | 4 | 5 | 5095.404 | -0.003 |
| 8  | 2 | 6  | 4 | 7 | 2 | 5 | 5 | 5119.650 | -0.009 |
| 8  | 2 | 7  | 5 | 7 | 2 | 6 | 4 | 5212.052 | 0.005  |
| 9  | 1 | 9  | 4 | 8 | 1 | 8 | 5 | 5244.795 | 0.009  |
| 9  | 0 | 9  | 4 | 8 | 0 | 8 | 5 | 5247.977 | 0.001  |
| 8  | 1 | 7  | 5 | 7 | 1 | 6 | 4 | 5287.887 | 0.005  |
| 8  | 6 | 3  | 5 | 7 | 6 | 2 | 4 | 5331.125 | 0.016  |
| 8  | 6 | 2  | 5 | 7 | 6 | 1 | 4 | 5331.125 | -0.006 |
| 8  | 5 | 4  | 5 | 7 | 5 | 3 | 4 | 5339.577 | 0.004  |
| 8  | 5 | 3  | 5 | 7 | 5 | 2 | 4 | 5340.529 | 0.010  |
| 8  | 4 | 5  | 5 | 7 | 4 | 4 | 4 | 5348.907 | 0.000  |
| 8  | 4 | 4  | 5 | 7 | 4 | 3 | 4 | 5366.992 | 0.008  |
| 8  | 3 | 5  | 5 | 7 | 3 | 4 | 4 | 5453.854 | -0.006 |
| 9  | 2 | 8  | 4 | 8 | 2 | 7 | 5 | 5458.685 | 0.006  |
| 8  | 2 | 6  | 5 | 7 | 2 | 5 | 4 | 5478.082 | 0.001  |
| 9  | 1 | 8  | 4 | 8 | 1 | 7 | 5 | 5510.089 | -0.002 |
| 9  | 3 | 7  | 4 | 8 | 3 | 6 | 5 | 5600.280 | 0.004  |
| 9  | 1 | 9  | 5 | 8 | 1 | 8 | 4 | 5603.659 | 0.002  |
| 9  | 0 | 9  | 5 | 8 | 0 | 8 | 4 | 5606.848 | -0.003 |
| 9  | 5 | 5  | 4 | 8 | 5 | 4 | 5 | 5633.922 | -0.003 |
| 9  | 5 | 4  | 4 | 8 | 5 | 3 | 5 | 5636.904 | 0.002  |
| 9  | 4 | 6  | 4 | 8 | 4 | 5 | 5 | 5641.855 | 0.002  |
| 9  | 4 | 5  | 4 | 8 | 4 | 4 | 5 | 5681.812 | -0.003 |
| 9  | 2 | 7  | 4 | 8 | 2 | 6 | 5 | 5754.073 | 0.005  |
| 9  | 3 | 6  | 4 | 8 | 3 | 5 | 5 | 5785.264 | 0.009  |
| 10 | 1 | 10 | 4 | 9 | 1 | 9 | 5 | 5835.321 | -0.003 |
| 10 | 0 | 10 | 4 | 9 | 0 | 9 | 5 | 5836.876 | 0.004  |
| 9  | 3 | 7  | 5 | 8 | 3 | 6 | 4 | 5958.326 | 0.003  |
| 9  | 6 | 4  | 5 | 8 | 6 | 3 | 4 | 5980.725 | -0.010 |
| 9  | 6 | 3  | 5 | 8 | 6 | 2 | 4 | 5980.847 | 0.003  |
| 9  | 5 | 5  | 5 | 8 | 5 | 4 | 4 | 5992.242 | -0.006 |
| 9  | 5 | 4  | 5 | 8 | 5 | 3 | 4 | 5995.224 | -0.005 |
| 9  | 4 | 6  | 5 | 8 | 4 | 5 | 4 | 6000.088 | 0.007  |
| 9  | 4 | 5  | 5 | 8 | 4 | 4 | 4 | 6040.097 | -0.002 |
| 10 | 1 | 9  | 4 | 9 | 1 | 8 | 5 | 6090.278 | -0.001 |
| 9  | 2 | 7  | 5 | 8 | 2 | 6 | 4 | 6112.278 | -0.002 |

|    |   |    |   |    |   |    |   |          |        |
|----|---|----|---|----|---|----|---|----------|--------|
| 9  | 3 | 6  | 5 | 8  | 3 | 5  | 4 | 6143.596 | -0.001 |
| 10 | 1 | 10 | 5 | 9  | 1 | 9  | 4 | 6194.188 | -0.003 |
| 10 | 0 | 10 | 5 | 9  | 0 | 9  | 4 | 6195.729 | -0.011 |
| 10 | 3 | 8  | 4 | 9  | 3 | 7  | 5 | 6225.213 | 0.002  |
| 10 | 5 | 6  | 4 | 9  | 5 | 5  | 5 | 6288.708 | 0.001  |
| 10 | 5 | 5  | 4 | 9  | 5 | 4  | 5 | 6296.686 | -0.002 |
| 10 | 4 | 6  | 4 | 9  | 4 | 5  | 5 | 6367.600 | 0.002  |
| 10 | 2 | 8  | 4 | 9  | 2 | 7  | 5 | 6367.881 | 0.004  |
| 11 | 1 | 11 | 4 | 10 | 1 | 10 | 5 | 6425.486 | -0.005 |
| 10 | 1 | 9  | 5 | 9  | 1 | 8  | 4 | 6449.183 | 0.000  |
| 10 | 3 | 7  | 4 | 9  | 3 | 6  | 5 | 6466.012 | -0.001 |
| 10 | 3 | 8  | 5 | 9  | 3 | 7  | 4 | 6582.911 | 0.007  |
| 10 | 4 | 7  | 5 | 9  | 4 | 6  | 4 | 6649.061 | 0.014  |
| 11 | 2 | 10 | 4 | 10 | 2 | 9  | 5 | 6653.596 | 0.005  |
| 10 | 5 | 5  | 5 | 9  | 5 | 4  | 4 | 6654.834 | 0.004  |
| 11 | 1 | 10 | 4 | 10 | 1 | 9  | 5 | 6672.284 | -0.001 |
| 10 | 4 | 6  | 5 | 9  | 4 | 5  | 4 | 6725.746 | 0.007  |
| 10 | 2 | 8  | 5 | 9  | 2 | 7  | 4 | 6725.746 | -0.001 |
| 11 | 0 | 11 | 5 | 10 | 0 | 10 | 4 | 6785.064 | -0.020 |
| 10 | 3 | 7  | 5 | 9  | 3 | 6  | 4 | 6824.232 | 0.008  |
| 11 | 3 | 9  | 4 | 10 | 3 | 8  | 5 | 6843.201 | 0.012  |
| 11 | 4 | 8  | 4 | 10 | 4 | 7  | 5 | 6936.059 | 0.004  |
| 11 | 2 | 9  | 4 | 10 | 2 | 8  | 5 | 6962.028 | 0.002  |
| 11 | 2 | 10 | 5 | 10 | 2 | 9  | 4 | 7012.367 | 0.005  |
| 12 | 1 | 12 | 4 | 11 | 1 | 11 | 5 | 7015.461 | -0.007 |
| 12 | 0 | 12 | 4 | 11 | 0 | 11 | 5 | 7015.785 | -0.023 |
| 11 | 1 | 10 | 5 | 10 | 1 | 9  | 4 | 7031.079 | -0.007 |
| 11 | 4 | 7  | 4 | 10 | 4 | 6  | 5 | 7064.302 | 0.003  |
| 11 | 3 | 8  | 4 | 10 | 3 | 7  | 5 | 7131.163 | 0.001  |
| 11 | 3 | 9  | 5 | 10 | 3 | 8  | 4 | 7199.952 | 0.005  |
| 12 | 1 | 11 | 4 | 11 | 1 | 10 | 5 | 7256.893 | -0.001 |
| 11 | 4 | 8  | 5 | 10 | 4 | 7  | 4 | 7293.854 | 0.008  |
| 11 | 2 | 9  | 5 | 10 | 2 | 8  | 4 | 7318.942 | -0.009 |
| 11 | 5 | 6  | 5 | 10 | 5 | 5  | 4 | 7321.432 | 0.003  |
| 12 | 0 | 12 | 5 | 11 | 0 | 11 | 4 | 7374.625 | -0.039 |
| 11 | 4 | 7  | 5 | 10 | 4 | 6  | 4 | 7422.315 | 0.009  |
| 11 | 3 | 8  | 5 | 10 | 3 | 7  | 4 | 7489.201 | 0.000  |
| 12 | 2 | 10 | 4 | 11 | 2 | 9  | 5 | 7542.908 | 0.007  |
| 12 | 1 | 11 | 5 | 11 | 1 | 10 | 4 | 7615.649 | 0.000  |
| 12 | 2 | 10 | 5 | 11 | 2 | 9  | 4 | 7901.629 | 0.002  |
| 13 | 1 | 13 | 5 | 12 | 1 | 12 | 4 | 7964.243 | 0.035  |
| 12 | 1 | 12 | 5 | 11 | 1 | 11 | 4 | 7374.333 | 0.008  |
| 9  | 2 | 8  | 5 | 8  | 2 | 7  | 4 | 5817.787 | -0.050 |
| 6  | 0 | 6  | 5 | 5  | 0 | 5  | 4 | 3846.737 | 0.005  |
| 6  | 1 | 6  | 5 | 5  | 1 | 5  | 4 | 3825.395 | 0.009  |
| 6  | 2 | 4  | 4 | 5  | 2 | 3  | 5 | 3800.340 | 0.002  |
| 6  | 1 | 5  | 4 | 5  | 1 | 4  | 5 | 3731.376 | 0.000  |
| 6  | 3 | 3  | 4 | 5  | 3 | 2  | 5 | 3725.047 | -0.012 |
| 6  | 4 | 2  | 4 | 5  | 4 | 1  | 5 | 3690.215 | -0.008 |
| 6  | 3 | 4  | 4 | 5  | 3 | 3  | 5 | 3687.357 | -0.005 |
| 6  | 2 | 5  | 4 | 5  | 2 | 4  | 5 | 3628.209 | -0.005 |
| 6  | 0 | 6  | 4 | 5  | 0 | 5  | 5 | 3487.829 | 0.013  |
| 5  | 2 | 3  | 5 | 4  | 2 | 2  | 4 | 3482.388 | 0.002  |
| 6  | 1 | 6  | 4 | 5  | 1 | 5  | 5 | 3466.498 | 0.011  |
| 5  | 3 | 2  | 5 | 4  | 3 | 1  | 4 | 3415.628 | -0.007 |
| 5  | 3 | 3  | 5 | 4  | 3 | 2  | 4 | 3400.467 | -0.038 |



|   |   |   |   |   |   |   |   |          |        |
|---|---|---|---|---|---|---|---|----------|--------|
| 5 | 2 | 4 | 5 | 4 | 2 | 3 | 4 | 3363.583 | 0.024  |
| 5 | 0 | 5 | 5 | 4 | 0 | 4 | 4 | 3261.664 | 0.010  |
| 5 | 1 | 5 | 5 | 4 | 1 | 4 | 4 | 3227.840 | 0.006  |
| 5 | 2 | 3 | 4 | 4 | 2 | 2 | 5 | 3123.621 | -0.011 |
| 5 | 1 | 4 | 4 | 4 | 1 | 3 | 5 | 3105.936 | -0.017 |
| 5 | 3 | 3 | 4 | 4 | 3 | 2 | 5 | 3041.747 | -0.010 |
| 5 | 2 | 4 | 4 | 4 | 2 | 3 | 5 | 3004.926 | -0.001 |
| 5 | 0 | 5 | 4 | 4 | 0 | 4 | 5 | 2902.714 | 0.011  |
| 5 | 1 | 5 | 4 | 4 | 1 | 4 | 5 | 2868.912 | 0.007  |
| 4 | 1 | 3 | 5 | 3 | 1 | 2 | 4 | 2823.382 | -0.015 |
| 4 | 3 | 2 | 5 | 3 | 3 | 1 | 4 | 2754.063 | -0.024 |
| 4 | 0 | 4 | 5 | 3 | 0 | 3 | 4 | 2672.057 | 0.004  |
| 4 | 1 | 4 | 5 | 3 | 1 | 3 | 4 | 2626.334 | 0.005  |

**Table S2.** Theoretical cartesian coordinates (Å) for conformer 1.

| Atom type | B3LYP-D3BJ/def2-TZPV |          |          |
|-----------|----------------------|----------|----------|
|           | <i>a</i>             | <i>b</i> | <i>c</i> |
| C         | -1.190               | 0.218    | -1.768   |
| C         | -1.223               | -0.389   | -0.513   |
| C         | 0.015                | -0.676   | 0.093    |
| C         | 1.249                | -0.372   | -0.514   |
| C         | 1.204                | 0.234    | -1.767   |
| C         | 0.003                | 0.529    | -2.392   |
| H         | -2.112               | 0.459    | -2.272   |
| H         | 2.123                | 0.487    | -2.270   |
| H         | 0.000                | 1.002    | -3.365   |
| C         | -2.568               | -0.714   | 0.164    |
| C         | -2.718               | 0.066    | 1.489    |
| H         | -3.679               | -0.166   | 1.952    |
| H         | -1.943               | -0.139   | 2.228    |
| H         | -2.685               | 1.138    | 1.294    |
| C         | -3.762               | -0.298   | -0.708   |
| H         | -3.767               | -0.822   | -1.664   |
| H         | -4.688               | -0.547   | -0.188   |
| H         | -3.768               | 0.774    | -0.902   |
| C         | -2.718               | -2.235   | 0.394    |
| H         | -2.672               | -2.761   | -0.560   |
| H         | -1.951               | -2.678   | 1.030    |
| H         | -3.684               | -2.448   | 0.856    |
| C         | 2.590                | -0.684   | 0.168    |
| C         | 2.704                | 0.085    | 1.499    |
| H         | 1.919                | -0.193   | 2.197    |
| H         | 3.669                | -0.125   | 1.966    |
| H         | 2.643                | 1.160    | 1.323    |
| C         | 3.783                | -0.257   | -0.700   |
| H         | 4.708                | -0.499   | -0.175   |
| H         | 3.800                | -0.781   | -1.657   |
| H         | 3.784                | 0.816    | -0.893   |
| C         | 2.729                | -2.199   | 0.413    |
| H         | 2.676                | -2.743   | -0.532   |
| H         | 3.699                | -2.412   | 0.869    |
| H         | 1.951                | -2.577   | 1.070    |
| O         | 0.081                | -1.267   | 1.330    |
| H         | -0.804               | -1.438   | 1.657    |
| Ar        | -0.042               | 2.883    | 0.661    |

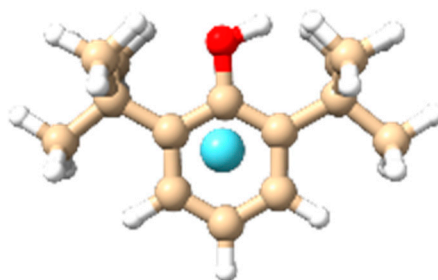

**Table S3.** Theoretical cartesian coordinates (Å) for conformer 2.

| Atom type | B3LYP-D3BJ/def2-TZPV |          |          |
|-----------|----------------------|----------|----------|
|           | <i>a</i>             | <i>b</i> | <i>c</i> |
| C         | -0.882               | 2.619    | 0.000    |
| C         | 0.021                | 1.556    | -0.000   |
| C         | -0.518               | 0.254    | -0.000   |
| C         | -1.905               | 0.006    | 0.000    |
| C         | -2.746               | 1.116    | 0.000    |
| C         | -2.249               | 2.409    | 0.000    |
| H         | -0.516               | 3.633    | 0.000    |
| H         | -3.816               | 0.974    | 0.000    |
| H         | -2.927               | 3.252    | 0.000    |
| C         | 1.539                | 1.817    | -0.000   |
| C         | 2.196                | 1.243    | -1.275   |
| H         | 3.270                | 1.438    | -1.262   |
| H         | 2.063                | 0.170    | -1.411   |
| H         | 1.772                | 1.724    | -2.158   |
| C         | 1.860                | 3.320    | 0.000    |
| H         | 1.465                | 3.819    | 0.885    |
| H         | 2.943                | 3.454    | 0.000    |
| H         | 1.464                | 3.819    | -0.884   |
| C         | 2.196                | 1.242    | 1.275    |
| H         | 1.772                | 1.723    | 2.158    |
| H         | 2.064                | 0.169    | 1.411    |
| H         | 3.270                | 1.438    | 1.262    |
| C         | -2.475               | -1.422   | -0.000   |
| C         | -2.023               | -2.179   | -1.265   |
| H         | -0.943               | -2.275   | -1.315   |
| H         | -2.459               | -3.180   | -1.270   |
| H         | -2.366               | -1.658   | -2.161   |
| C         | -4.010               | -1.420   | 0.000    |
| H         | -4.365               | -2.452   | 0.000    |
| H         | -4.419               | -0.931   | 0.885    |
| H         | -4.419               | -0.931   | -0.885   |
| C         | -2.023               | -2.179   | 1.264    |
| H         | -2.366               | -1.658   | 2.161    |
| H         | -2.459               | -3.181   | 1.270    |
| H         | -0.943               | -2.275   | 1.315    |
| O         | 0.291                | -0.852   | -0.000   |
| H         | 1.212                | -0.585   | -0.000   |
| Ar        | 3.462                | -2.340   | 0.000    |

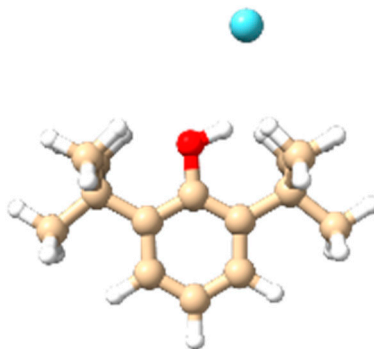

**Table S4.** Theoretical cartesian coordinates (Å) for conformer 3.

| Atom type | B3LYP-D3BJ/def2-TZPV |          |          |
|-----------|----------------------|----------|----------|
|           | <i>a</i>             | <i>b</i> | <i>c</i> |
| C         | 1.013                | 0.646    | 0.000    |
| C         | 0.323                | -0.565   | 0.000    |
| C         | -1.084               | -0.502   | -0.000   |
| C         | -1.791               | 0.716    | 0.000    |
| C         | -1.035               | 1.885    | 0.000    |
| C         | 0.349                | 1.860    | 0.000    |
| H         | 2.090                | 0.650    | 0.000    |
| H         | -1.533               | 2.842    | 0.000    |
| H         | 0.910                | 2.785    | 0.000    |
| C         | 1.090                | -1.902   | 0.000    |
| C         | 0.776                | -2.717   | -1.274   |
| H         | 1.342                | -3.651   | -1.267   |
| H         | -0.274               | -2.977   | -1.400   |
| H         | 1.065                | -2.149   | -2.159   |
| C         | 2.611                | -1.685   | 0.000    |
| H         | 2.943                | -1.141   | 0.884    |
| H         | 3.110                | -2.655   | 0.000    |
| H         | 2.943                | -1.141   | -0.884   |
| C         | 0.776                | -2.717   | 1.274    |
| H         | 1.065                | -2.149   | 2.159    |
| H         | -0.275               | -2.977   | 1.400    |
| H         | 1.342                | -3.651   | 1.267    |
| C         | -3.328               | 0.764    | -0.000   |
| C         | -3.885               | 0.081    | -1.265   |
| H         | -3.606               | -0.966   | -1.316   |
| H         | -4.976               | 0.147    | -1.270   |
| H         | -3.514               | 0.582    | -2.161   |
| C         | -3.851               | 2.208    | 0.000    |
| H         | -4.942               | 2.189    | -0.000   |
| H         | -3.531               | 2.759    | 0.885    |
| H         | -3.531               | 2.759    | -0.885   |
| C         | -3.886               | 0.081    | 1.265    |
| H         | -3.514               | 0.582    | 2.161    |
| H         | -4.976               | 0.147    | 1.270    |
| H         | -3.606               | -0.966   | 1.316    |
| O         | -1.847               | -1.643   | -0.000   |
| H         | -1.278               | -2.415   | -0.000   |
| Ar        | 4.893                | 1.499    | -0.000   |

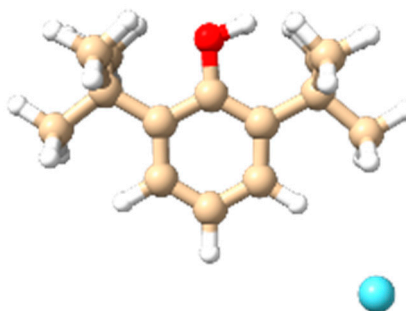

**Table S5.** Theoretical cartesian coordinates (Å) for conformer 4.

| Atom type | B3LYP-D3BJ/def2-TZPV |          |          |
|-----------|----------------------|----------|----------|
|           | <i>a</i>             | <i>b</i> | <i>c</i> |
| C         | -0.432               | 2.206    | -0.000   |
| C         | -0.034               | 0.869    | -0.000   |
| C         | -1.055               | -0.103   | -0.000   |
| C         | -2.424               | 0.229    | 0.000    |
| C         | -2.745               | 1.584    | 0.000    |
| C         | -1.767               | 2.566    | -0.000   |
| H         | 0.311                | 2.986    | -0.000   |
| H         | -3.780               | 1.887    | 0.000    |
| H         | -2.047               | 3.611    | -0.000   |
| C         | 1.460                | 0.495    | 0.000    |
| C         | 1.830                | -0.295   | -1.274   |
| H         | 2.895                | -0.534   | -1.269   |
| H         | 1.289                | -1.234   | -1.400   |
| H         | 1.619                | 0.306    | -2.159   |
| C         | 2.359                | 1.741    | 0.000    |
| H         | 2.197                | 2.358    | 0.884    |
| H         | 3.403                | 1.428    | 0.000    |
| H         | 2.197                | 2.358    | -0.884   |
| C         | 1.830                | -0.295   | 1.274    |
| H         | 1.620                | 0.306    | 2.159    |
| H         | 1.289                | -1.234   | 1.400    |
| H         | 2.895                | -0.534   | 1.269    |
| C         | -3.522               | -0.846   | 0.000    |
| C         | -3.416               | -1.721   | -1.265   |
| H         | -2.467               | -2.246   | -1.316   |
| H         | -4.220               | -2.461   | -1.270   |
| H         | -3.519               | -1.105   | -2.161   |
| C         | -4.926               | -0.223   | 0.000    |
| H         | -5.668               | -1.024   | 0.000    |
| H         | -5.103               | 0.389    | 0.885    |
| H         | -5.103               | 0.389    | -0.885   |
| C         | -3.416               | -1.721   | 1.265    |
| H         | -3.519               | -1.106   | 2.161    |
| H         | -4.219               | -2.461   | 1.270    |
| H         | -2.466               | -2.246   | 1.316    |
| O         | -0.759               | -1.443   | -0.000   |
| H         | 0.191                | -1.567   | -0.000   |
| Ar        | 5.747                | -0.725   | 0.000    |

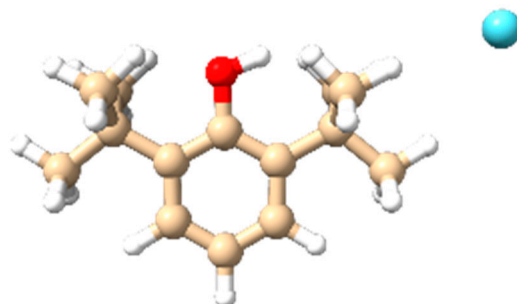

**Table S6.** Theoretical cartesian coordinates (Å) for conformer 5.

| Atom type | B3LYP-D3BJ/def2-TZPV |          |          |
|-----------|----------------------|----------|----------|
|           | <i>a</i>             | <i>b</i> | <i>c</i> |
| C         | 2.194                | 1.818    | 0.123    |
| C         | 2.230                | 0.424    | 0.144    |
| C         | 1.048                | -0.253   | -0.214   |
| C         | -0.133               | 0.419    | -0.584   |
| C         | -0.094               | 1.811    | -0.582   |
| C         | 1.050                | 2.509    | -0.234   |
| H         | 3.074                | 2.382    | 0.390    |
| H         | -0.975               | 2.370    | -0.858   |
| H         | 1.050                | 3.591    | -0.241   |
| C         | 3.518                | -0.320   | 0.545    |
| C         | 4.039                | -1.189   | -0.621   |
| H         | 4.960                | -1.695   | -0.326   |
| H         | 3.343                | -1.956   | -0.962   |
| H         | 4.256                | -0.559   | -1.484   |
| C         | 4.657                | 0.654    | 0.887    |
| H         | 4.401                | 1.297    | 1.730    |
| H         | 5.544                | 0.083    | 1.163    |
| H         | 4.919                | 1.285    | 0.038    |
| C         | 3.291                | -1.170   | 1.815    |
| H         | 2.986                | -0.528   | 2.642    |
| H         | 2.523                | -1.938   | 1.717    |
| H         | 4.218                | -1.674   | 2.097    |
| C         | -1.413               | -0.338   | -0.972   |
| C         | -1.158               | -1.221   | -2.210   |
| H         | -0.398               | -1.974   | -2.022   |
| H         | -2.082               | -1.729   | -2.497   |
| H         | -0.835               | -0.608   | -3.054   |
| C         | -2.554               | 0.624    | -1.334   |
| H         | -3.437               | 0.042    | -1.600   |
| H         | -2.825               | 1.270    | -0.498   |
| H         | -2.302               | 1.252    | -2.190   |
| C         | -1.904               | -1.200   | 0.206    |
| H         | -2.112               | -0.572   | 1.075    |
| H         | -2.829               | -1.710   | -0.068   |
| H         | -1.171               | -1.949   | 0.492    |
| O         | 0.989                | -1.624   | -0.222   |
| H         | 1.834                | -1.988   | 0.047    |
| Ar        | -5.440               | 0.012    | 1.110    |

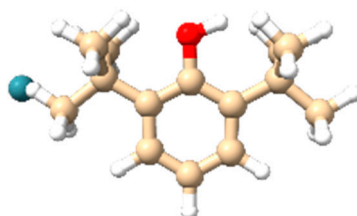

Supplement: s1 [file s1]
